# Supplementary material for: Listeria monocytogenes: possible mechanism of infection of goat uterus and its effects on uterine autophagy and cell apoptosis
Source: Frontiers journal article supplement (doi:10.3389/fvets.2024.1413523), 2024-08-15
Supplement: Data_Sheet_1.ZIP [file Data_Sheet_1.ZIP]

## Sheet: Sheet1
	一	bax		bcl-2		lc3b		pink1		parkin		β-actin			二	bax		bcl-2		lc3b		pink1		parkin		β-actin		三	bax		bcl-2		lc3b		pink1		parkin		β-actin
	A	32.1327	A	30.4791	A	32.7133			A	34.3407	A	28.9978			A	35.1697	A	30	A	28.1545	A	32.1237	A	34.5359	A	28.52		A	34.9595	A	31.9849	A	28.8061	A	34.7694	A	35.0787	A	28.931
	A	32.0919	A	30.0873	A	35.7123			A	34.0112	A	28.9064			A	35.4481	A	30	A	28.2534	A	32.3388	A	33.6687	A	28.7736		A	34.1942	A	30.5842	A	28.6236	A	32.1686	A	34.5	A	28.7888
	B	30.8901	B	25.8429	B	26.0341			B	34.0711	B	26.7702			B	30.3824	B	32.4873	B	26.9071	B	30.498	B	34.3594	B	27.7809		B	29.7574	B	29.6743	B	25.9156	B	31.1795	B	33.1741	B	26.5938
	B	31.2521	B	25.8859	B	25.5257			B	34.248	B	26.7533			B	30.9214	B	31.775	B	26.6307	B	33.0428	B	34.6647	B	27.7741		B	29.5241	B	29.4413	B	25.7133	B	30.5676	B	32.9554	B	26.5693
	C	28.9073	C	24.9539	C	23.9618			C	31.0457	C	23.9022			C	28.9759	C	26.9192	C	24.6268	C	28.2141	C	30.8953	C	22.652		C	29.1497	C	28.1916	C	24.9515	C	30.1977	C	33.1727	C	24.895
	C	28.439	C	24.9723	C	24.2884			C	31.6485	C	23.9648			C	28.9097	C	26.896	C	24.6546	C	28.7104	C	31.2658	C	22.8309		C	29.0119	C	28.2435	C	24.9424	C	30.1352	C	33.197	C	24.9703
	a	29.9053	a	24.4873	a	26.7903			a	31.4479	a	25.2825			a	29.9418	a	26.2247	a	25.2103	a	30.8146	a	31.4488	a	25.8312		a	30.1396	a	28.8761	a	24.439	a	30.8274	a	33.8884	a	25.808
	a	29.9465	a	24.7484	a	25.7104			a	32.3706	a	25.3137			a	30.4106	a	26.5336	a	25.4623	a	30.9112	a	31.9221	a	25.901		a	30.7276	a	29.0688	a	24.7671	a	30.903	a	32.5617	a	25.6569
	b	32.2036	b	27.0632	b	26.8812			b	32.5239	b	24.9009			b	31.9271	b	27.4383	b	27.1414	b	31.1393	b	32.9612	b	25.5924		b	30.7329	b	29.4599	b	27.0703	b	30.9537	b	32.7987	b	25.1931
	b	31.9672	b	27.1268	b	26.6877			b	32.6901	b	24.8583			b	31.9405	b	29.8753	b	27.5747	b	30.7924	b	32.9221	b	25.689		b	31.2351	b	29.9654	b	26.9515	b	30.9744	b	32.8254	b	25.0569
	c	27.3273	c	22.2044	c	24.9425			c	31.439	c	21.5007			c	31.9387	c	26.9349	c	24.9182	c	28.871	c	32.3262	c	23.3766		c	30.2833	c	26.2482	c	23.3387	c	27.9764	c	31.9321	c	22.4645
	c	27.6391	c	22.2857	c	25.8638			c	31.0541	c	21.4716			c	31.7508	c	27.1662	c	24.9229	c	28.3456	c	32.4247	c	23.472		c	30.0937	c	26.4105	c	23.645	c	28.1995	c	32.1518	c	22.5383
	A	A	B	B	C	C	a	a	b	b	c	c			A	A	B	B	C	C	a	a	b	b	c	c			A	A	B	B	C	C	a	a	b	b	c	c
β-actin	28.9978	28.9064	26.7702	26.7533	23.9022	23.9648	25.2825	25.3137	24.9009	24.8583	21.5007	21.4716		β-actin	28.52	28.7736	27.7809	27.7741	22.652	22.8309	25.8312	25.901	25.5924	25.689	23.3766	23.472		β-actin	28.931	28.7888	26.5938	26.5693	24.895	24.9703	25.808	25.6569	25.1931	25.0569	22.4645	22.5383
bax	32.1327	32.0919	30.8901	31.2521	28.9073	28.439	29.9053	29.9465	32.2036	31.9672	27.3273	27.6391		bax	35.1697	35.4481	30.3824	30.9214	28.9759	28.9097	29.9418	30.4106	31.9271	31.9405	31.9387	31.7508		bax	34.9595	34.1942	29.7574	29.5241	29.1497	29.0119	30.1396	30.7276	30.7329	31.2351	30.2833	30.0937
ΔCT	3.13496	3.18545	4.11992	4.49883	5.00505	4.47425	4.62285	4.63277	7.30268	7.10895	5.82658	6.16753		ΔCT	6.64972	6.67452	2.60149	3.14729	6.32386	6.07882	4.11059	4.50961	6.33472	6.25148	8.56203	8.2788		ΔCT	6.02849	5.4054	3.1637	2.95482	4.25475	4.04164	4.33158	5.07073	5.53972	6.1782	7.81885	7.55543
mean							5.94356							mean							6.3412							mean							6.08242
ΔΔCT	-2.8086	-2.75811	-1.82364	-1.44473	-0.938506	-1.46931	-1.32071	-1.31079	1.35912	1.16539	-0.116979	0.223973		ΔΔCT	0.30852	0.333319	-3.73972	-3.19391	-0.017341	-0.262386	-2.23061	-1.8316	-0.00648435	-0.0897268	2.22083	1.93759		ΔΔCT	-0.0539277	-0.67702	-2.91872	-3.1276	-1.82767	-2.04078	-1.75084	-1.01168	-0.542701	0.0957858	1.73643	1.47301
2^-(ΔΔCT）	7.00606	6.76508	3.53972	2.72213	1.91654	2.7689	2.49789	2.48077	0.38982	0.445845	1.08446	0.856204		2^-(ΔΔCT）	0.80747	0.793708	13.3588	9.1509	1.01209	1.19946	4.69333	3.55931	1.0045	1.06417	0.214518	0.261052		2^-(ΔΔCT）	1.03809	1.59883	7.56176	8.73979	3.54963	4.11468	3.36554	2.01626	1.4567	0.935762	0.300111	0.36023
	A	A	B	B	C	C	a	a	b	b	c	c			A	A	B	B	C	C	a	a	b	b	c	c			A	A	B	B	C	C	a	a	b	b	c	c
β-actin	28.9978	28.9064	26.7702	26.7533	23.9022	23.9648	25.2825	25.3137	24.9009	24.8583	21.5007	21.4716		β-actin	28.52	28.7736	27.7809	27.7741	22.652	22.8309	25.8312	25.901	25.5924	25.689	23.3766	23.472		β-actin	28.931	28.7888	26.5938	26.5693	24.895	24.9703	25.808	25.6569	25.1931	25.0569	22.4645	22.5383
bcl-2	30.4791	30.0873	25.8429	25.8859	24.9539	24.9723	24.4873	24.7484	27.0632	27.1268	22.2044	22.2857		bcl-2	30	30	32.4873	31.775	26.9192	26.896	26.2247	26.5336	27.4383	29.8753	26.9349	27.1662		bcl-2	31.9849	30.5842	29.6743	29.4413	28.1916	28.2435	28.8761	29.0688	29.4599	29.9654	26.2482	26.4105
ΔCT	1.48135	1.18091	-0.927284	-0.867382	1.05166	1.00757	-0.795151	-0.565306	2.16234	2.26848	0.703669	0.814068		ΔCT	1.48	1.22639	4.70639	4.00089	4.26722	4.06514	0.393534	0.632622	1.84593	4.18621	3.55829	3.69422		ΔCT	3.05389	1.79541	3.08056	2.872	3.29665	3.27323	3.06814	3.41188	4.26675	4.90858	3.78368	3.87217
mean							0.764684							mean							2.38514							mean							3.8852
ΔΔCT	0.716662	0.416228	-1.69197	-1.63207	0.286979	0.24289	-1.55983	-1.32999	1.39765	1.5038	-0.0610151	0.0493841		ΔΔCT	-0.905138	-1.15875	2.32125	1.61575	1.88209	1.68001	-1.9916	-1.75251	-0.539206	1.80108	1.17316	1.30909		ΔΔCT	-0.831311	-2.08979	-0.804639	-1.0132	-0.588547	-0.611973	-0.817059	-0.473323	0.381551	1.02338	-0.101519	-0.0130259
2^-(ΔΔCT）	0.608504	0.749381	3.23097	3.09957	0.819617	0.845051	2.9482	2.51401	0.379546	0.352623	1.0432	0.966349		2^-(ΔΔCT）	1.87272	2.23263	0.200094	0.326295	0.271291	0.312081	3.97678	3.36945	1.45317	0.28696	0.44345	0.403576		2^-(ΔΔCT）	1.7793	4.25685	1.74671	2.01838	1.50373	1.52835	1.76181	1.3883	0.767612	0.491964	1.0729	1.00907
	A	A	B	B	C	C	a	a	b	b	c	c			A	A	B	B	C	C	a	a	b	b	c	c			A	A	B	B	C	C	a	a	b	b	c	c
β-actin	28.9978	28.9064	26.7702	26.7533	23.9022	23.9648	25.2825	25.3137	24.9009	24.8583	21.5007	21.4716		β-actin	28.52	28.7736	27.7809	27.7741	22.652	22.8309	25.8312	25.901	25.5924	25.689	23.3766	23.472		β-actin	28.931	28.7888	26.5938	26.5693	24.895	24.9703	25.808	25.6569	25.1931	25.0569	22.4645	22.5383
lc3b	32.7133	35.7123	26.0341	25.5257	23.9618	24.2884	26.7903	25.7104	26.8812	26.6877	24.9425	25.8638		lc3b	28.1545	28.2534	26.9071	26.6307	24.6268	24.6546	25.2103	25.4623	27.1414	27.5747	24.9182	24.9229		lc3b	28.8061	28.6236	25.9156	25.7133	24.9515	24.9424	24.439	24.7671	27.0703	26.9515	23.3387	23.645
ΔCT	3.71548	6.80589	-0.736116	-1.22762	0.0595493	0.323662	1.50784	0.396645	1.98029	1.82937	3.44182	4.39218		ΔCT	-0.36552	-0.520248	-0.873777	-1.1434	1.97477	1.82373	-0.620892	-0.438675	1.54906	1.88567	1.54153	1.45093		ΔCT	-0.124922	-0.165152	-0.678106	-0.856001	0.0565224	-0.0278187	-1.36894	-0.889772	1.87712	1.89461	0.874247	1.1067
mean							2.25802							mean							0.894602							mean							0.582326
ΔΔCT	1.45746	4.54787	-2.99414	-3.48564	-2.19847	-1.93436	-0.750181	-1.86138	-0.277735	-0.42865	1.18379	2.13415		ΔΔCT	-1.26012	-1.41485	-1.76838	-2.038	1.08017	0.929126	-1.51549	-1.33328	0.654455	0.991067	0.646924	0.556325		ΔΔCT	-0.707248	-0.747478	-1.26043	-1.43833	-0.525804	-0.610145	-1.95127	-1.4721	1.2948	1.31228	0.291921	0.524369
2^-(ΔΔCT）	0.364134	0.0427519	7.96757	11.2017	4.58994	3.82209	1.682	3.63355	1.21229	1.34597	0.440193	0.227801		2^-(ΔΔCT）	2.39516	2.66632	3.40671	4.10675	0.472973	0.525176	2.85897	2.51974	0.635316	0.503105	0.63864	0.680032		2^-(ΔΔCT）	1.63269	1.67885	2.39568	2.71006	1.43974	1.52641	3.86714	2.77425	0.407594	0.402684	0.816814	0.695263
	A	A	B	B	C	C	a	a	b	b	c	c			A	A	B	B	C	C	a	a	b	b	c	c			A	A	B	B	C	C	a	a	b	b	c	c
β-actin	28.9978	28.9064	26.7702	26.7533	23.9022	23.9648	25.2825	25.3137	24.9009	24.8583	21.5007	21.4716		β-actin	28.52	28.7736	27.7809	27.7741	22.652	22.8309	25.8312	25.901	25.5924	25.689	23.3766	23.472		β-actin	28.931	28.7888	26.5938	26.5693	24.895	24.9703	25.808	25.6569	25.1931	25.0569	22.4645	22.5383
pink1														pink1	32.1237	32.3388	30.498	33.0428	28.2141	28.7104	30.8146	30.9112	31.1393	30.7924	28.871	28.3456		pink1	34.7694	32.1686	31.1795	30.5676	30.1977	30.1352	30.8274	30.903	30.9537	30.9744	27.9764	28.1995
ΔCT														ΔCT	3.60368	3.5652	2.71713	5.26866	5.56211	5.87953	4.98337	5.0102	5.54693	5.10335	5.49434	4.8736		ΔCT	5.8384	3.37976	4.58579	3.99832	5.30277	5.16498	5.01938	5.24614	5.76051	5.91755	5.51196	5.66126
mean														mean							5.16863							mean							5.51947
ΔΔCT														ΔΔCT	-1.56496	-1.60343	-2.4515	0.100026	0.393476	0.710895	-0.185267	-0.158431	0.378301	-0.0652854	0.325712	-0.295029		ΔΔCT	0.318933	-2.13971	-0.933677	-1.52115	-0.216697	-0.354487	-0.500085	-0.273328	0.241042	0.398084	-0.00750637	0.141793
2^-(ΔΔCT）														2^-(ΔΔCT）	2.95868	3.03865	5.46985	0.933016	0.761293	0.610941	1.13703	1.11607	0.769343	1.04629	0.797905	1.22691		2^-(ΔΔCT）	0.801663	4.40673	1.91014	2.87019	1.16207	1.27853	1.4143	1.20859	0.846134	0.758866	1.00522	0.906392
	A	A	B	B	C	C	a	a	b	b	c	c			A	A	B	B	C	C	a	a	b	b	c	c			A	A	B	B	C	C	a	a	b	b	c	c
β-actin	28.9978	28.9064	26.7702	26.7533	23.9022	23.9648	25.2825	25.3137	24.9009	24.8583	21.5007	21.4716		β-actin	28.52	28.7736	27.7809	27.7741	22.652	22.8309	25.8312	25.901	25.5924	25.689	23.3766	23.472		β-actin	28.931	28.7888	26.5938	26.5693	24.895	24.9703	25.808	25.6569	25.1931	25.0569	22.4645	22.5383
parkin	34.3407	34.0112	34.0711	34.248	31.0457	31.6485	31.4479	32.3706	32.5239	32.6901	31.439	31.0541		parkin	34.5359	33.6687	34.3594	34.6647	30.8953	31.2658	31.4488	31.9221	32.9612	32.9221	32.3262	32.4247		parkin	35.0787	34.5	33.1741	32.9554	33.1727	33.197	33.8884	32.5617	32.7987	32.8254	31.9321	32.1518
ΔCT	5.3429	5.1048	7.30085	7.49473	7.1435	7.68377	6.16546	7.05691	7.623	7.83177	9.93832	9.58256		ΔCT	6.01593	4.89507	6.57849	6.89065	8.24334	8.43492	5.61755	6.02113	7.36883	7.23306	8.94956	8.95269		ΔCT	6.1477	5.71123	6.58032	6.38613	8.27773	8.22679	8.08039	6.90478	7.60551	7.76852	9.46762	9.61352
mean							8.033							mean							7.35714							mean							8.24005
ΔΔCT	-2.6901	-2.9282	-0.732152	-0.538273	-0.889504	-0.349234	-1.86754	-0.976096	-0.409999	-0.201232	1.90531	1.54955		ΔΔCT	-1.3412	-2.46207	-0.778649	-0.466487	0.886205	1.07779	-1.73958	-1.336	0.0116914	-0.124081	1.59242	1.59555		ΔΔCT	-2.09235	-2.52882	-1.65974	-1.85393	0.0376765	-0.0132669	-0.159665	-1.33528	-0.634548	-0.471532	1.22756	1.37346
2^-(ΔΔCT）	6.45358	7.61159	1.66111	1.45223	1.85254	1.27388	3.64911	1.96713	1.32868	1.14968	0.266958	0.341616		2^-(ΔΔCT）	2.53363	5.51006	1.71552	1.38174	0.541035	0.473755	3.33939	2.52451	0.991929	1.08981	0.331614	0.330895		2^-(ΔΔCT）	4.26443	5.771	3.15959	3.61482	0.974223	1.00924	1.11703	2.52324	1.55245	1.38658	0.427039	0.385964
																												1.03809	1.59883	7.56176	8.73979	3.54963	4.11468	3.36554	2.01626	1.4567	0.935762	0.300111	0.36023
Bax	7.00605	6.76508	3.53972	2.72213	1.91654	2.7689	2.49789	2.48077	0.38982	0.445845	1.08446	0.856204		0.80747	0.793708	13.3588	9.1509	1.01209	1.19946	4.69333	3.55931	1.0045	1.06417	0.214518	0.261052			1.7793	4.25685	1.74671	2.01838	1.50373	1.52835	1.76181	1.3883	0.767612	0.491964	1.0729	1.00907
Bcl-2	0.608504	0.749381	3.23097	3.09957	0.819617	0.845051	2.9482	2.51401	0.379546	0.352623	1.0432	0.966349		1.87272	2.23263	0.200094	0.326295	0.271291	0.312081	3.97678	3.36945	1.45317	0.28696	0.44345	0.403576			0.583424	0.375591	4.32915	4.3301	2.36055	2.69224	1.91027	1.45232	1.8977	1.90209	0.279719	0.356992
Bax/Bcl-2	11.5136	9.02756	1.09556	0.878228	2.33834	3.27661	0.847261	0.986779	1.02707	1.26437	1.03955	0.886019		0.431174	0.355503	66.7627	28.0449	3.73065	3.84343	1.18018	1.05635	0.69125	3.70842	0.483748	0.646847

## Sheet: Sheet4
	一	bax		bcl-2		lc3b		pink1		parkin		β-actin			二	bax		bcl-2		lc3b		pink1		parkin		β-actin		三	bax		bcl-2		lc3b		pink1		parkin		β-actin
	A	32.1327	A	30.4791	A	32.7133			A	34.3407	A	28.9978			A	35.1697	A	30	A	28.1545	A	37.1237	A	34.5359	A	28.52		A	34.9595	A	31.9849	A	28.8061	A	34.7694	A	35.0787	A	28.931
	A	32.0919	A	30.0873	A	35.7123			A	34.0112	A	28.9064			A	35.4481	A	30	A	28.2534	A	32.3388	A	33.6687	A	28.7736		A	34.1942	A	30.5842	A	28.6236	A	32.1686	A	34.5	A	28.7888
	B	30.8901	B	25.8429	B	26.0341			B	34.0711	B	26.7702			B	30.3824	B	32.4873	B	26.9071	B	30.498	B	34.3594	B	27.7809		B	29.7574	B	29.6743	B	25.9156	B	31.1795	B	33.1741	B	26.5938
	B	31.2521	B	25.8859	B	25.5257			B	34.248	B	26.7533			B	30.9214	B	31.775	B	26.6307	B	33.0428	B	34.6647	B	27.7741		B	29.5241	B	29.4413	B	25.7133	B	30.5676	B	32.9554	B	26.5693
	C	28.9073	C	24.9539	C	23.9618			C	31.0457	C	23.9022			C	28.9759	C	26.9192	C	24.6268	C	28.2141	C	30.8953	C	22.652		C	29.1497	C	28.1916	C	24.9515	C	30.1977	C	33.1727	C	24.895
	C	28.439	C	24.9723	C	24.2884			C	31.6485	C	23.9648			C	28.9097	C	26.896	C	24.6546	C	28.7104	C	31.2658	C	22.8309		C	29.0119	C	28.2435	C	24.9424	C	30.1352	C	33.197	C	24.9703
	a	29.9053	a	24.4873	a	26.7903			a	31.4479	a	25.2825			a	29.9418	a	26.2247	a	25.2103	a	30.8146	a	31.4488	a	25.8312		a	30.1396	a	28.8761	a	24.439	a	30.8274	a	33.8884	a	25.808
	a	29.9465	a	24.7484	a	25.7104			a	32.3706	a	25.3137			a	30.4106	a	26.5336	a	25.4623	a	30.9112	a	31.9221	a	25.901		a	30.7276	a	29.0688	a	24.7671	a	30.903	a	32.5617	a	25.6569
	b	32.2036	b	27.0632	b	26.8812			b	32.5239	b	24.9009			b	31.9271	b	27.4383	b	27.1414	b	31.1393	b	32.9612	b	25.5924		b	30.7329	b	29.4599	b	27.0703	b	30.9537	b	32.7987	b	25.1931
	b	31.9672	b	27.1268	b	26.6877			b	32.6901	b	24.8583			b	31.9405	b	29.8753	b	27.5747	b	30.7924	b	32.9221	b	25.689		b	31.2351	b	29.9654	b	26.9515	b	30.9744	b	32.8254	b	25.0569
	c	27.3273	c	22.2044	c	24.9425			c	31.439	c	21.5007			c	31.9387	c	26.9349	c	24.9182	c	28.871	c	32.3262	c	23.3766		c	30.2833	c	26.2482	c	23.3387	c	27.9764	c	31.9321	c	22.4645
	c	27.6391	c	22.2857	c	25.8638			c	31.0541	c	21.4716			c	31.7508	c	27.1662	c	24.9229	c	28.3456	c	32.4247	c	23.472		c	30.0937	c	26.4105	c	23.645	c	28.1995	c	32.1518	c	22.5383
	A	A	a	a	B	B	b	b	C	C	c	c			A	A	a	a	B	B	b	b	C	C	c	c			A	A	a	a	B	B	b	b	C	C	c	c
β-actin	28.9978	28.9064	25.2825	25.3137	26.7702	26.7533	24.9009	24.8583	23.9022	23.9648	21.5007	21.4716		β-actin	28.52	28.7736	25.8312	25.901	27.7809	27.7741	25.5924	25.689	22.652	22.8309	23.3766	23.472		β-actin	28.931	28.7888	25.808	25.6569	26.5938	26.5693	25.1931	25.0569	24.895	24.9703	22.4645	22.5383
bax	32.1327	32.0919	29.9053	29.9465	30.8901	31.2521	32.2036	31.9672	28.9073	28.439	27.3273	27.6391		bax	35.1697	35.4481	29.9418	30.4106	30.3824	30.9214	31.9271	31.9405	28.9759	28.9097	31.9387	31.7508		bax	34.9595	34.1942	30.1396	30.7276	29.7574	29.5241	30.7329	31.2351	29.1497	29.0119	30.2833	30.0937
ΔCT	3.13496	3.18545	4.62285	4.63277	4.11992	4.49883	7.30268	7.10895	5.00505	4.47425	5.82658	6.16753		ΔCT	6.64972	6.67452	4.11059	4.50961	2.60149	3.14729	6.33472	6.25148	6.32386	6.07882	8.56203	8.2788		ΔCT	6.02849	5.4054	4.33158	5.07073	3.1637	2.95482	5.53972	6.1782	4.25475	4.04164	7.81885	7.55543
mean			4.62781				7.20581				5.99706			mean			4.3101				6.2931				8.42042			mean			4.70116				5.85896				7.68714
ΔΔCT	-1.49285	-1.44236	-0.00496197	0.00496197	-3.08589	-2.70699	0.0968657	-0.0968657	-0.992003	-1.52281	-0.170476	0.170476		ΔΔCT	2.33963	2.36442	-0.199506	0.199506	-3.69161	-3.14581	0.0416212	-0.0416212	-2.09655	-2.3416	0.141619	-0.141619		ΔΔCT	1.32733	0.704241	-0.369577	0.369577	-2.69526	-2.90414	-0.319243	0.319243	-3.43239	-3.6455	0.131711	-0.131711
2^-(ΔΔCT）	2.81445	2.71765	1.00345	0.996567	8.49073	6.52956	0.935062	1.06945	1.98895	2.8735	1.12543	0.888549		2^-(ΔΔCT）	0.197562	0.194195	1.1483	0.870849	12.9207	8.8508	0.971563	1.02927	4.27686	5.06863	0.906501	1.10314		2^-(ΔΔCT）	0.398504	0.613765	1.29197	0.774009	6.47672	7.48572	1.24768	0.80149	10.7957	12.5142	0.912748	1.09559
	A	A	a	a	B	B	b	b	C	C	c	c			A	A	a	a	B	B	b	b	C	C	c	c			A	A	a	a	B	B	b	b	C	C	c	c
β-actin	28.9978	28.9064	25.2825	25.3137	26.7702	26.7533	24.9009	24.8583	23.9022	23.9648	21.5007	21.4716		β-actin	28.52	28.7736	25.8312	25.901	27.7809	27.7741	25.5924	25.689	22.652	22.8309	23.3766	23.472		β-actin	28.931	28.7888	25.808	25.6569	26.5938	26.5693	25.1931	25.0569	24.895	24.9703	22.4645	22.5383
bcl-2	30.4791	30.0873	24.4873	24.7484	25.8429	25.8859	27.0632	27.1268	24.9539	24.9723	22.2044	22.2857		bcl-2	30	30	26.2247	26.5336	32.4873	31.775	27.4383	27.8753	26.9192	26.896	26.9349	27.1662		bcl-2	31.9849	30.5842	28.8761	29.0688	29.6743	29.4413	29.4599	29.9654	28.1916	28.2435	26.2482	26.4105
ΔCT	1.48135	1.18091	-0.795151	-0.565306	-0.927284	-0.867382	2.16234	2.26848	1.05166	1.00757	0.703669	0.814068		ΔCT	1.48	1.22639	0.393534	0.632622	4.70639	4.00089	1.84593	2.18621	4.26722	4.06514	3.55829	3.69422		ΔCT	3.05389	1.79541	3.06814	3.41188	3.08056	2.872	4.26675	4.90858	3.29665	3.27323	3.78368	3.87217
mean			-0.680228				2.21541				0.758868			mean			0.513078				2.01607				3.62626			mean			3.24001				4.58766				3.82793
ΔΔCT	2.16157	1.86114	-0.114923	0.114923	-3.1427	-3.08279	-0.0530729	0.0530729	0.292794	0.248706	-0.0551996	0.0551996		ΔΔCT	0.96692	0.713311	-0.119544	0.119544	2.69032	1.98482	-0.170141	0.170141	0.640965	0.438886	-0.0679655	0.0679655		ΔΔCT	-0.18612	-1.44459	-0.171868	0.171868	-1.5071	-1.71566	-0.320912	0.320912	-0.531275	-0.554701	-0.0442467	0.0442467
2^-(ΔΔCT）	0.223512	0.275259	1.08292	0.923432	8.83173	8.47253	1.03747	0.963881	0.816319	0.841651	1.039	0.962461		2^-(ΔΔCT）	0.511597	0.609919	1.08639	0.920479	0.15493	0.252645	1.12517	0.888756	0.641284	0.737704	1.04824	0.953982		2^-(ΔΔCT）	1.1377	2.72186	1.12652	0.887692	2.84239	3.28448	1.24912	0.800563	1.44521	1.46886	1.03114	0.969796
	A	A	a	a	B	B	b	b	C	C	c	c			A	A	a	a	B	B	b	b	C	C	c	c			A	A	a	a	B	B	b	b	C	C	c	c
β-actin	28.9978	28.9064	25.2825	25.3137	26.7702	26.7533	24.9009	24.8583	23.9022	23.9648	21.5007	21.4716		β-actin	28.52	28.7736	25.8312	25.901	27.7809	27.7741	25.5924	25.689	22.652	22.8309	23.3766	23.472		β-actin	28.931	28.7888	25.808	25.6569	26.5938	26.5693	25.1931	25.0569	24.895	24.9703	22.4645	22.5383
lc3b	32.7133	35.7123	26.7903	25.7104	26.0341	25.5257	26.8812	26.6877	23.9618	24.2884	24.9425	25.8638		lc3b	28.1545	28.2534	25.2103	25.4623	26.9071	26.6307	27.1414	27.5747	24.6268	24.6546	24.9182	24.9229		lc3b	28.8061	28.6236	24.439	24.7671	25.9156	25.7133	27.0703	26.9515	24.9515	24.9424	23.3387	23.645
ΔCT	3.71548	6.80589	1.50784	0.396645	-0.736116	-1.22762	1.98029	1.82937	0.0595493	0.323662	3.44182	4.39218		ΔCT	-0.36552	-0.520248	-0.620892	-0.438675	-0.873777	-1.1434	1.54906	1.88567	1.97477	1.82373	1.54153	1.45093		ΔCT	-0.124922	-0.165152	-1.36894	-0.889772	-0.678106	-0.856001	1.87712	1.89461	0.0565224	-0.0278187	0.874247	1.1067
mean			0.952244				1.90483				3.917			mean			-0.529783				1.71736				1.49623			mean			-1.12936				1.88586				0.990471
ΔΔCT	2.76324	5.85365	0.555599	-0.555599	-2.64095	-3.13245	0.0754576	-0.0754576	-3.85745	-3.59334	-0.475181	0.475181		ΔΔCT	0.164263	0.00953484	-0.0911083	0.0911083	-2.59114	-2.86076	-0.168306	0.168306	0.478546	0.327501	0.0452995	-0.0452995		ΔΔCT	1.00443	0.964205	-0.239584	0.239584	-2.56397	-2.74186	-0.00874233	0.00874233	-0.933949	-1.01829	-0.116224	0.116224
2^-(ΔΔCT）	0.147293	0.0172932	0.680374	1.46978	6.23742	8.76921	0.949041	1.0537	14.4946	12.0698	1.39009	0.719377		2^-(ΔΔCT）	0.892384	0.993413	1.06519	0.938801	6.02575	7.26398	1.12374	0.889887	0.717701	0.796916	0.969089	1.0319		2^-(ΔΔCT）	0.498465	0.512561	1.18065	0.84699	5.91333	6.68934	1.00608	0.993959	1.9105	2.02552	1.08389	0.922599
	A	A	a	a	B	B	b	b	C	C	c	c			A	A	a	a	B	B	b	b	C	C	c	c			A	A	a	a	B	B	b	b	C	C	c	c
β-actin	28.9978	28.9064	25.2825	25.3137	26.7702	26.7533	24.9009	24.8583	23.9022	23.9648	21.5007	21.4716		β-actin	28.52	28.7736	25.8312	25.901	27.7809	27.7741	25.5924	25.689	22.652	22.8309	23.3766	23.472		β-actin	28.931	28.7888	25.808	25.6569	26.5938	26.5693	25.1931	25.0569	24.895	24.9703	22.4645	22.5383
pink1														pink1	32.1237	32.3388	30.8146	30.9112	30.498	33.0428	31.1393	30.7924	28.2141	28.7104	28.871	28.3456		pink1	34.7694	32.1686	30.8274	30.903	31.1795	30.5676	30.9537	30.9744	30.1977	30.1352	27.9764	28.1995
ΔCT														ΔCT	3.60368	3.5652	4.98337	5.0102	2.71713	5.26866	5.54693	5.10335	5.56211	5.87953	5.49434	4.8736		ΔCT	5.8384	3.37976	5.01938	5.24614	4.58579	3.99832	5.76051	5.91755	5.30277	5.16498	5.51196	5.66126
mean														mean			4.99678				5.32514				5.18397			mean			5.13276				5.83903				5.58661
ΔΔCT														ΔΔCT	-1.39311	-1.43158	-0.0134182	0.0134182	-2.60801	-0.0564814	0.221793	-0.221793	0.378135	0.695554	0.31037	-0.31037		ΔΔCT	0.705639	-1.753	-0.113379	0.113379	-1.25324	-1.84071	-0.0785208	0.0785208	-0.28384	-0.421631	-0.0746498	0.0746498
2^-(ΔΔCT）														2^-(ΔΔCT）	2.62644	2.69742	1.00934	0.990742	6.09661	1.03993	0.857499	1.16618	0.769432	0.617472	0.806435	1.24003		2^-(ΔΔCT）	0.613171	3.37059	1.08176	0.924421	2.38376	3.58186	1.05593	0.947028	1.21743	1.33944	1.05311	0.949573
	A	A	a	a	B	B	b	b	C	C	c	c			A	A	a	a	B	B	b	b	C	C	c	c			A	A	a	a	B	B	b	b	C	C	c	c
β-actin	28.9978	28.9064	25.2825	25.3137	26.7702	26.7533	24.9009	24.8583	23.9022	23.9648	21.5007	21.4716		β-actin	28.52	28.7736	25.8312	25.901	27.7809	27.7741	25.5924	25.689	22.652	22.8309	23.3766	23.472		β-actin	28.931	28.7888	25.808	25.6569	26.5938	26.5693	25.1931	25.0569	24.895	24.9703	22.4645	22.5383
parkin	34.3407	34.0112	31.4479	32.3706	34.0711	34.248	32.5239	32.6901	31.0457	31.6485	31.439	31.0541		parkin	34.5359	33.6687	31.4488	31.9221	34.3594	34.6647	32.9612	32.9221	30.8953	31.2658	32.3262	32.4247		parkin	35.0787	34.5	33.8884	32.5617	33.1741	32.9554	32.7987	32.8254	33.1727	33.197	31.9321	32.1518
ΔCT	5.3429	5.1048	6.16546	7.05691	7.30085	7.49473	7.623	7.83177	7.1435	7.68377	9.93832	9.58256		ΔCT	6.01593	4.89507	5.61755	6.02113	6.57849	6.89065	7.36883	7.23306	8.24334	8.43492	8.94956	8.95269		ΔCT	6.1477	5.71123	8.08039	6.90478	6.58032	6.38613	7.60551	7.76852	8.27773	8.22679	9.46762	9.61352
mean			6.61118				7.72739				9.76044			mean			5.81934				7.30094				8.95113			mean			7.49258				7.68701				9.54057
ΔΔCT	-1.26828	-1.50638	-0.445724	0.445724	-0.426537	-0.232658	-0.104383	0.104383	-2.61694	-2.07667	0.17788	-0.17788		ΔΔCT	0.196589	-0.924275	-0.201789	0.201789	-0.722454	-0.410292	0.0678864	-0.0678864	-0.707784	-0.516202	-0.00156498	0.00156498		ΔΔCT	-1.34488	-1.78135	0.587807	-0.587807	-1.1067	-1.30089	-0.0815077	0.0815077	-1.26284	-1.31378	-0.0729513	0.0729513
2^-(ΔΔCT）	2.40874	2.84096	1.362	0.734216	1.344	1.175	1.07503	0.930202	6.13447	4.21832	0.884001	1.13122		2^-(ΔΔCT）	0.872611	1.89773	1.15012	0.869472	1.64999	1.32895	0.954035	1.04818	1.63329	1.43019	1.00109	0.998916		2^-(ΔΔCT）	2.54009	3.43747	0.665354	1.50296	2.15352	2.4638	1.05812	0.945069	2.39967	2.48592	1.05187	0.950691
																				0.971563	1.02927	0.912748	1.09559	12.9207	8.8508	10.7957	12.5142
																				1.24912	0.800563	1.03114	0.969796	2.84239	3.28448	1.44521	1.46886
																				0.777798	1.28568	0.885179	1.12971	4.54573	2.69474	7.47002	8.51967

## Sheet: Sheet2
	一	E-ca	Met	β-actin	二	E-ca	Met	β-actin
	A	30.7906	30.4854	27.9584	A	36.598	29.0943	27.1824
	A	33.3689	30.5033	27.6629	A	35.4599	28.8044	25.9447
	B	22.889	24.8003	20.1856	B	24.5769	24.7247	20.3724
	B	23.265	24.4674	20.1746	B	24.7511	25.3	20.5352
	C	30.0368	31.7572	27.6475	C	27.5002	33.9099	23.9764
	C	29.9185	31.1853	27.5452	C	27.8331	33.1446	24.0164
	a	29.3715	30.2224	26.5417	a	23.8255	23.7257	21.6477
	a	29.3801	30.2299	26.7484	a	24.0559	24.1329	21.5868
	b	19.2966	20.8613	17.9571	b	23.6635	22.0534	18.5444
	b	19.1816	20.9655	17.8749	b	23.77	22.2657	18.3852
	c	20.4361	21.7867	18.2684	c	24.4483	21.1054	19.249
	c	21.2681	22.662	17.9218	c	25.5059	22.2552	19.6552
	A	A	B	B	C	C	a	a	b	b	c	c			A	A	B	B	C	C	a	a	b	b	c	c
β-actin	27.9584	27.6629	20.1856	20.1746	27.6475	27.5452	26.5417	26.7484	17.9571	17.8749	18.2684	17.9218		β-actin	27.1824	25.9447	20.3724	20.5352	23.9764	24.0164	21.6477	21.5868	18.5444	18.3852	19.249	19.6552
E-ca	30.7906	33.3689	22.889	23.265	30.0368	29.9185	29.3715	29.3801	19.2966	19.1816	20.4361	21.2681		E-ca	36.598	35.4599	24.5769	24.7511	27.5002	27.8331	23.8255	24.0559	23.6635	23.77	24.4483	25.5059
ΔCT	2.83217	5.70601	2.70343	3.09048	2.38928	2.37332	2.82981	2.63171	1.33954	1.30668	2.16768	3.34625		ΔCT	9.41558	9.51521	4.20448	4.21597	3.52383	3.81667	2.17779	2.46908	5.11918	5.38481	5.19938	5.85072
mean							2.27028							mean							4.36682
ΔΔCT	0.561895	3.43573	0.433149	0.820197	0.118999	0.10304	0.559528	0.361436	-0.930737	-0.963599	-0.102601	1.07597		ΔΔCT	5.04875	5.14839	-0.162345	-0.150851	-0.84299	-0.550156	-2.18903	-1.89775	0.752353	1.01798	0.832551	1.48389
2^-(ΔΔCT）	0.677412	0.0924151	0.740644	0.566364	0.920826	0.931069	0.678524	0.778389	1.90625	1.95017	1.07371	0.474351		2^-(ΔΔCT）	0.0302116	0.0281956	1.1191	1.11022	1.79376	1.46424	4.56	3.72631	0.593635	0.493806	0.561535	0.357523
	A	A	B	B	C	C	a	a	b	b	c	c			A	A	B	B	C	C	a	a	b	b	c	c
β-actin	27.9584	27.6629	20.1856	20.1746	27.6475	27.5452	26.5417	26.7484	17.9571	17.8749	18.2684	17.9218		β-actin	27.1824	25.9447	20.3724	20.5352	23.9764	24.0164	21.6477	21.5868	18.5444	18.3852	19.249	19.6552
Met	30.4854	30.5033	24.8003	24.4674	31.7572	31.1853	30.2224	30.2299	20.8613	20.9655	21.7867	22.662		Met	29.0943	28.8044	24.7247	25.3	33.9099	33.1446	23.7257	24.1329	22.0534	22.2657	21.1054	22.2552
ΔCT	2.52695	2.84036	4.61468	4.29281	4.1097	3.64008	3.68066	3.48145	2.90425	3.09066	3.51829	4.74012		ΔCT	1.91185	2.8597	4.35226	4.76479	9.93349	9.12821	2.07794	2.54614	3.50908	3.88043	1.85641	2.59997
mean							3.56924							mean							2.745
ΔΔCT	-1.04229	-0.728877	1.04544	0.72357	0.540462	0.0708447	0.111422	-0.0877857	-0.664993	-0.478575	-0.0509472	1.17088		ΔΔCT	-0.833145	0.114702	1.60726	2.0198	7.18849	6.38322	-0.667053	-0.198854	0.764082	1.13544	-0.888584	-0.145027
2^-(ΔΔCT）	2.05949	1.65735	0.484498	0.605597	0.68755	0.95208	0.925675	1.06274	1.58556	1.39337	1.03594	0.444151		2^-(ΔΔCT）	1.78157	0.923573	0.32822	0.246593	0.00685564	0.0119801	1.58783	1.14779	0.588828	0.455197	1.85136	1.10575

## Sheet: Sheet3
	一	E-ca	Met	β-actin	二	E-ca	Met	β-actin
	A	30.7906	30.4854	27.9584	A	36.598	29.0943	27.1824
	A	33.3689	30.5033	27.6629	A	35.4599	28.8044	25.9447
	B	22.889	24.8003	20.1856	B	24.5769	24.7247	20.3724
	B	23.265	24.4674	20.1746	B	24.7511	25.3	20.5352
	C	30.0368	31.7572	27.6475	C	27.5002	33.9099	23.9764
	C	29.9185	31.1853	27.5452	C	27.8331	33.1446	24.0164
	a	29.3715	30.2224	26.5417	a	23.8255	23.7257	21.6477
	a	29.3801	30.2299	26.7484	a	24.0559	24.1329	21.5868
	b	19.2966	20.8613	17.9571	b	23.6635	22.0534	18.5444
	b	19.1816	20.9655	17.8749	b	23.77	22.2657	18.3852
	c	20.4361	21.7867	18.2684	c	24.4483	21.1054	19.249
	c	21.2681	22.662	17.9218	c	25.5059	22.2552	19.6552
															A	A	a	a	B	B	b	b	C	C	c	c
	A	A	a	a	B	B	b	b	C	C	c	c		β-actin	27.1824	25.9447	21.6477	21.5868	20.3724	20.5352	18.5444	18.3852	23.9764	24.0164	19.249	19.6552
β-actin	27.9584	27.6629	26.5417	26.7484	20.1856	20.1746	17.9571	17.8749	27.6475	27.5452	18.2684	17.9218		E-ca	36.598	35.4599	23.8255	24.0559	24.5769	24.7511	23.6635	23.77	27.5002	27.8331	24.4483	25.5059
E-ca	30.7906	33.3689	29.3715	29.3801	22.889	23.265	19.2966	19.1816	30.0368	29.9185	20.4361	21.2681		ΔCT	9.41558	9.51521	2.17779	2.46908	4.20448	4.21597	5.11918	5.38481	3.52383	3.81667	5.19938	5.85072
ΔCT	2.83217	5.70601	2.82981	2.63171	2.70343	3.09048	1.33954	1.30668	2.38928	2.37332	2.16768	3.34625		mean			2.32343				5.25199				5.52505
mean			2.73076				1.32311				2.75696			ΔΔCT	7.09214	7.19178	-0.145643	0.145643	-1.04751	-1.03602	-0.132815	0.132815	-2.00121	-1.70838	-0.325671	0.325671
ΔΔCT	0.101413	2.97525	0.0990458	-0.0990458	1.38032	1.76737	0.0164309	-0.0164309	-0.367687	-0.383646	-0.589287	0.589287		2^-(ΔΔCT）	0.00732912	0.00684005	1.10622	0.903976	2.06696	2.05056	1.09643	0.91205	4.00336	3.26793	1.25325	0.797927
2^-(ΔΔCT）	0.93212	0.127163	0.93365	1.07106	0.384134	0.293745	0.988676	1.01145	1.29028	1.30463	1.5045	0.664671
															A	A	a	a	B	B	b	b	C	C	c	c
	A	A	a	a	B	B	b	b	C	C	c	c		β-actin	27.1824	25.9447	21.6477	21.5868	20.3724	20.5352	18.5444	18.3852	23.9764	24.0164	19.249	19.6552
β-actin	27.9584	27.6629	26.5417	26.7484	20.1856	20.1746	17.9571	17.8749	27.6475	27.5452	18.2684	17.9218		Met	29.0943	28.8044	23.7257	24.1329	24.7247	25.3	22.0534	22.2657	33.9099	33.1446	21.1054	22.2552
Met	30.4854	30.5033	30.2224	30.2299	24.8003	24.4674	20.8613	20.9655	31.7572	31.1853	21.7867	22.662		ΔCT	1.91185	2.8597	2.07794	2.54614	4.35226	4.76479	3.50908	3.88043	9.93349	9.12821	1.85641	2.59997
ΔCT	2.52695	2.84036	3.68066	3.48145	4.61468	4.29281	2.90425	3.09066	4.1097	3.64008	3.51829	4.74012		mean			2.31204				3.69475				2.22819
mean			3.58106				2.99745				4.1292			ΔΔCT	-0.400191	0.547656	-0.234099	0.234099	0.657504	1.07004	-0.185678	0.185678	7.7053	6.90002	-0.371778	0.371778
ΔΔCT	-1.0541	-0.740695	0.0996037	-0.0996037	1.61722	1.29535	-0.0932093	0.0932093	-0.0195036	-0.489121	-0.610913	0.610913		2^-(ΔΔCT）	1.31968	0.684131	1.17617	0.850216	0.633974	0.476306	1.13735	0.879236	0.00479153	0.0083731	1.29395	0.772829
2^-(ΔΔCT）	2.07643	1.67098	0.933289	1.07148	0.325962	0.407436	1.06674	0.937435	1.01361	1.40359	1.52723	0.654782
